## Graphical Abstract

### Generic solving of one-compartment toxicokinetic models

Sandrine Charles, Aude Ratier, Christelle Lopes

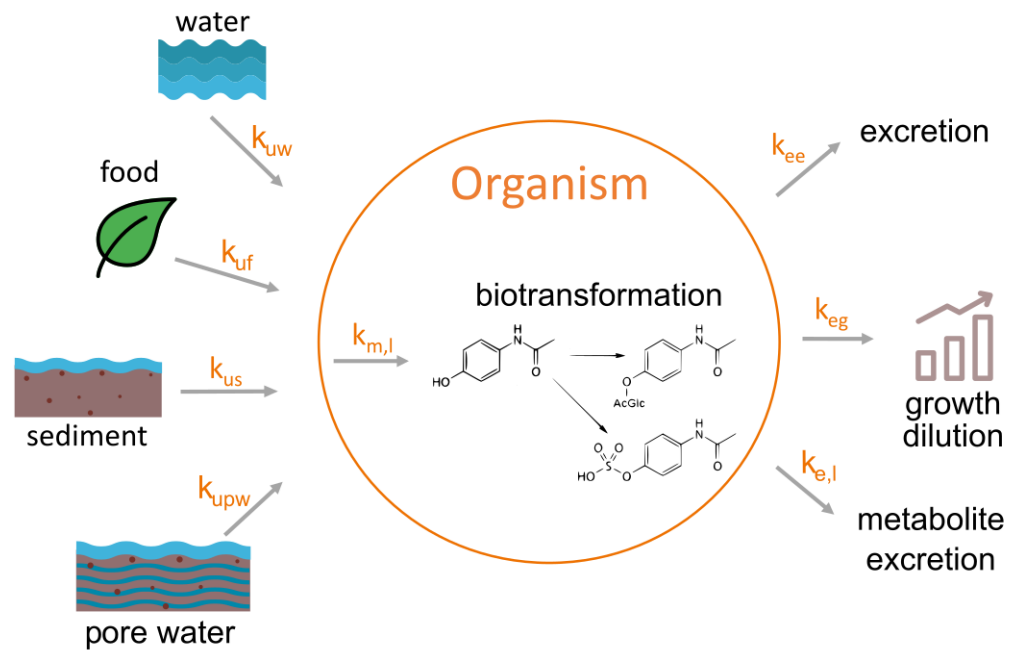

# Generic solving of one-compartment toxicokinetic models

Sandrine Charles<sup>a,1,\*</sup>, Aude Ratier<sup>a</sup>, Christelle Lopes<sup>a</sup>

<sup>a</sup>*Université de Lyon; Université Lyon 1; CNRS; UMR 5558, 43 boulevard du 11 novembre 1918, Villeurbanne Cedex, F-69622, France*

---

## Abstract

This paper gives the full analytical solution of the generic set of ordinary differential equations that define one-compartment toxicokinetic models. These models describe uptake and elimination processes taking place within living organisms when exposed to chemical substances. The models solved in this paper consider living organisms as a unique compartment, into which a parent compound enters via several possible exposure routes and from which it is eliminated as well as its potential metabolites. Benefiting from generic solutions of one-compartment toxicokinetic models is particularly useful when fitting them to experimental data, facilitating the writing of the inference algorithms leading to parameter estimates. Additionally, these models are of crucial interest in environmental risk assessment for the calculation of bioaccumulation metrics as required by regulators in support of decision making when they evaluate dossiers for marketing authorisation of active substances.

*Keywords:* ordinary differential equations, environmental risk assessment, living organisms, active substances, TK models, bioaccumulation metrics

*MSC:* 92B05

---

## 1. Introduction

In this paper, we consider a very generic one-compartment toxicokinetic (TK) model describing uptake and elimination processes taking place within living organisms when exposed to chemical substances. On a general point

---

\*Corresponding author

Email address: `sandrine.charles@univ-lyon1.fr` (Sandrine Charles)

of view, TK models are of particular interest in Environmental Risk Assessment [6], for example when the calculation of bioaccumulation metrics is required by regulators in support of decision making when they evaluate dossiers for marketing authorisation of active substances.

The generic TK model considered in this paper is a one-compartment model considering organisms as a whole in which compounds may enter and from which these compounds can be eliminated). Note that there exists more complex TK models refining the description of contamination pathways within organisms, distinguishing organs and tissues from physiological hypotheses on potential targets of exposure compounds; such physiologically-based TK (PBTk) models mainly apply for humans [9, 8] or big mammals [3, 5]. The generic one-compartment TK model considered in this paper has the advantage of accounting for several exposure sources (*e.g.*, by water, sediment and/or food), several elimination processes (*e.g.*, direct elimination, dilution by growth and/or biotransformation) and several potential metabolites of the parent chemical compound to which organisms are exposed [7]. This generic TK model is composed of two sets of ordinary differential equations (ODE), one set for the accumulation phase (that includes both bioaccumulation and elimination processes, as those related to the biotransformation of the parent compound into metabolites) and during which organisms are exposed to a given compound; the second one for the depuration phase (with only elimination processes including biotransformation) and during which organisms are transferred into a clean medium. The transition from one set of ODE to the other takes place at time  $t_c$  corresponding to the duration of the accumulation phase (see Table 1).

In practice, the exposure concentration to which organisms are exposed may vary over time as in realistic environments, but then, there is no analytical solution of the TK model; only a numerical solution can be calculated in this case with an appropriate algorithm. Our paper thus assumes that the exposure concentration remains constant over time whatever the exposure source. Such an experimental condition can be ensured for most of the chemical compound when performing laboratory experiments. In addition, this assumption allows to provide the exact solution of the full one-compartment TK model by considering as many routes of exposure and as many elimination processes as desired, as well as an infinite number of phase I metabolites, *i.e.*, directly derived from the parent compound to which organisms are exposed. Note that [4] already provided a partially resolved one-compartment TK model but only for the accumulation phase and one exposure route.

## 2. The one-compartment TK set of ODE

### 2.1. Accumulation phase ( $0 \leq t \leq t_c$ )

The set of ODE describing the accumulation phase ( $0 \leq t \leq t_c$ ) writes as follows:

$$\begin{cases} \frac{dC_p(t)}{dt} = U - (E + M) \times C_p(t) & (1.a) \\ \frac{dC_{m_\ell}(t)}{dt} = k_{m_\ell} \times C_p(t) - k_{e_\ell} \times C_{m_\ell}(t), \forall \ell = 1 \dots L & (1.b) \end{cases}$$

All parameters and variables, with their meaning and units when applicable, are gathered together in Table 1.

Equation (1.a) for the parent compound is a linear first-order ODE with constant coefficients and a second member. Equation (1.a) admits  $C_{part}(t) = \frac{U}{E+M} = R$  as a particular solution. Equation (1.a) without its second member writes:

$$\frac{dC_p(t)}{dt} - (E + M) \times C_p(t) = 0 \Leftrightarrow C_p(t) = K \times e^{-(E+M) \times t}, K \in \mathbb{R}^+ \quad (2)$$

Given the initial condition  $C(t = 0) = C_0$  ( $C_0 \geq 0$ ), we finally get the full analytical solution of Equation (1.a), providing the internal concentration of the parent compound over time during the accumulation phase ( $0 \leq t \leq t_c$ ) as follows:

$$C_p(t) = (C_0 - R) \times e^{-(E+M) \times t} + R \quad (3)$$

See Table 1 for the definition of parameter  $R$ .

Equation (1.b) is also a linear first-order ODE with constant coefficients and a second member, with the following analytical solution when removing its second member:

$$\frac{dC_{m_\ell}(t)}{dt} - k_{e_\ell} \times C_{m_\ell}(t) = 0 \Leftrightarrow C_{m_\ell}(t) = K \times e^{-k_{e_\ell} \times t}, K \in \mathbb{R}^+, \forall \ell = 1 \dots L \quad (4)$$

The method of variation of a constant consists of writing the general solution of Equation (1.b) as:

$$C_{m_\ell}(t) = K(t) \times e^{-k_{e_\ell} \times t} \quad (5)$$

and to find function  $K(t)$  by deriving  $C_{m_\ell}(t)$  and re-injecting the result into

Equation (5). The derivative from Equation (1.b) writes:

$$\frac{dC_{m_\ell}(t)}{dt} = \frac{dK(t)}{dt} \times e^{-k_{e_\ell} \times t} - K(t) \times k_{e_\ell} \times e^{-k_{e_\ell} \times t} \quad (6)$$

while the re-injection into Equation (1.b) leads to:

$$\frac{dK(t)}{dt} = k_{m_\ell} \times \left( (C_0 - R) \times e^{D_\ell \times t} + R \times e^{k_{e_\ell} \times t} \right) \quad (7)$$

which integrates into:

$$K(t) = k_{m_\ell} \times \left( \frac{C_0 - R}{D_\ell} \times e^{D_\ell \times t} + \frac{R}{k_{e_\ell}} \times e^{k_{e_\ell} \times t} \right) + C, C \in \mathbb{R} \quad (8)$$

See Table 1 for the definition of parameter  $D_\ell$ .

The general solution of Equation (1.b) finally writes as follows:

$$C_{m_\ell}(t) = k_{m_\ell} \times \left( \frac{C_0 - R}{D_\ell} \times e^{-(E+M) \times t} + \frac{R}{k_{e_\ell}} \right) + C \times e^{-k_{e_\ell} \times t}, C \in \mathbb{R} \quad (9)$$

Let's consider the following initial condition  $C_{m_\ell}(t = 0) = 0$ , biologically meaning that when the accumulation phase starts, organisms are only exposed to the parent compound, so that there are no metabolites within. Then, we finally get the full analytical solution of Equation (1.b) providing the internal concentration of metabolite  $\ell$  over time during the accumulation phase:

$$C_{m_\ell}(t) = k_{m_\ell} \times \left( \frac{C_0 - R}{D_\ell} \times \left( e^{-(E+M) \times t} - e^{-k_{e_\ell} \times t} \right) + \frac{R}{k_{e_\ell}} \times \left( 1 - e^{-k_{e_\ell} \times t} \right) \right) \quad (10)$$

## 75 2.2. Depuration phase ( $t \geq t_c$ )

76 The set of ODE describing the depuration phase ( $t \geq t_c$ ) writes as follows:

$$\begin{cases} \frac{dC_p(t)}{dt} = -(E + M) \times C_p(t) & (11.a) \\ \frac{dC_{m_\ell}(t)}{dt} = k_{m_\ell} \times C_p(t) - k_{e_\ell} \times C_{m_\ell}(t), \forall \ell = 1 \dots L & (11.b) \end{cases}$$

77 All parameters and variables, with their meaning and units when applicable,

78 are gathered together in Table 1.

79 Equation (11.a) is a linear first-order ODE without a second member, so

80 that it has a general solution of the following form:

$$C_p(t) = K \times e^{-(E+M) \times t}, K \in \mathbb{R}^+ \quad (12)$$

81 For the depuration phase and the parent compound, the initial condition

82 comes from the calculation of the internal parent compound concentration

83 at the end of the accumulation phase (*i.e.*, at time  $t = t_c$ ) thanks to solution

84 (3):

$$C_p(t_c) = (C_0 - R) \times e^{-(E+M) \times t_c} + R \quad (13)$$

85 From the general analytical solution given by Equation (12), we get  $C_p(t_c) =$

86  $Ke^{-(E+M)t_c}$  leading to a constant  $K$  in Equation (12) equals to:

$$K = C_0 - R + R \times e^{(E+M) \times t_c} \quad (14)$$

87 Then, the final analytical solution of Equation (11.a) providing the internal

88 concentration of the parent compound over time during the depuration phase

89  $(t \geq t_c)$  writes:

$$C_p(t) = \left( C_0 - R \times \left( 1 - e^{(E+M) \times t_c} \right) \right) \times e^{-(E+M) \times t} \quad (15)$$

90 For simplicity reasons, Equation (15) above can be written as  $C_p(t) =$   
 91  $Qe^{-(E+M) \times t}$  with  $Q$  as defined in Table 1.

92 Equation (11.b) is a linear first-order ODE with constant coefficients and  
 93 a second member. The analytical solution of Equation (11.b) without its  
 94 second member writes:

$$C_{m_\ell}(t) = K \times e^{-k_{e_\ell} \times t}, K \in \mathbb{R}^+ \quad (16)$$

95 As previously, the method of the variation of a constant provides the general  
 96 solution of Equation (11.b) as  $C_{m_\ell}(t) = K(t)e^{-k_{e_\ell} t}$ , requiring to search for  
 97 function  $K(t)$ .

98 The derivative of  $C_{m_\ell}(t)$  from Equation (16) writes:

$$\frac{dK(t)}{dt} = e^{-k_{e_\ell} \times t} - k_{e_\ell} \times K(t) \times e^{-k_{e_\ell} \times t} \quad (17)$$

99 The re-injection of derivative (17) into Equation (11.b) leads to:

$$\frac{dK(t)}{dt} = k_{m_\ell} \times Q \times e^{D_\ell \times t} \quad (18)$$

100 which integrates into:

$$K(t) = k_{m_\ell} \times \frac{Q}{D_\ell} \times e^{D_\ell \times t} + C, C \in \mathbb{R} \quad (19)$$



101 finally leading to the general analytical solution of Equation (11.b):

$$C_{m_\ell}(t) = k_{m_\ell} \times \frac{Q}{D_\ell} \times e^{-(E+M) \times t} + C \times e^{-k_{e_\ell} \times t}, C \in \mathbb{R} \quad (20)$$

102 Constant  $C$  can be determined from the initial condition, *i.e.*, from the in-  
 103 ternal concentration of metabolite  $\ell$  at  $t = t_c$  both at the end of the accumu-  
 104 lation phase and at the beginning of the depuration phase. From Equation  
 105 (20), we get  $C_{m_\ell}(t_c) = k_{m_\ell} \frac{Q}{D_\ell} e^{-(E+M)t_c} + C e^{-k_{e_\ell} t_c}$ , and from Equation (10),  
 106 we get  $C_{m_\ell}(t_c) = k_{m_\ell} \left( \frac{C_0 - R}{D_\ell} (e^{-(E+M)t_c} - e^{-k_{e_\ell} t_c}) + \frac{R}{k_{e_\ell}} (1 - e^{-k_{e_\ell} t_c}) \right)$ . Fi-  
 107 nally, we get the following expression for constant  $C$ :

$$C = k_{m_\ell} \times \left( \frac{R}{k_{e_\ell}} \times (e^{k_{e_\ell} \times t_c} - 1) - \frac{C_0 - R}{D_\ell} - \frac{R}{D_\ell} \times e^{k_{e_\ell} \times t_c} \right) \quad (21)$$

Replacing constant  $C$  in Equation (20) gives the final analytical solution of  
 Equation (11.b) providing the internal concentration of metabolite  $\ell$  for the  
 depuration phase ( $t > t_c$ ) as follows:

$$C_{m_\ell}(t) = k_{m_\ell} \times \left( \frac{Q}{D_\ell} \times e^{-(E+M) \times t} + \frac{R}{k_{e_\ell}} \times (e^{-k_{e_\ell} \times (t-t_c)} - e^{-k_{e_\ell} \times t}) \right. \\ \left. - \frac{C_0 - R}{D_\ell} \times e^{-k_{e_\ell} \times t} - \frac{R}{D_\ell} \times e^{-k_{e_\ell} \times (t-t_c)} \right) \quad (22)$$

Replacing constant  $Q$  by its own expression (Table 1) leads to:

$$C_{m_\ell}(t) = k_{m_\ell} \times \left( \frac{C_0 - R}{D_\ell} \times (e^{-(E+M) \times t} - e^{-k_{e_\ell} \times t}) + \frac{R}{k_{e_\ell}} \times (e^{-k_{e_\ell} \times (t-t_c)} - e^{-k_{e_\ell} \times t}) \right. \\ \left. + \frac{R}{D_\ell} \times (e^{-(E+M) \times (t-t_c)} - e^{-k_{e_\ell} \times (t-t_c)}) \right) \quad (23)$$

### 108 3. The generic set of solutions

109 Reminding the following intermediate notations  $R = \frac{U}{E+M}$  and  $D_\ell = k_{e_\ell} -$   
 110  $(E + M)$  we finally obtain the full set of analytical solutions corresponding  
 111 the whole one-compartment TK set of ODE describing the time-course for  
 112 both the accumulation and the depuration phases of the parent compound  
 113 and its potential metabolites.

- The analytical solution for the internal concentration of the parent compound during the accumulation phase, previously referred as Equation (3):

$$C_p(t) = \left( C_0 - \frac{U}{E + M} \right) \times e^{-(E+M) \times t} + \frac{U}{E + M}, \forall 0 \leq t \leq t_c$$

- The analytical solution for the internal concentration of metabolite  $\ell$  during the accumulation phase, previously referred as Equation (10):

$$C_{m_\ell}(t) = \frac{k_{m_\ell}}{k_{e_\ell}} \times \frac{U}{E + M} \times \left( 1 - e^{-k_{e_\ell} \times t} \right) + \frac{k_{m_\ell}}{k_{e_\ell} - (E + M)} \\ \times \left( C_0 - \frac{U}{E + M} \right) \times \left( e^{-(E+M) \times t} - e^{-k_{e_\ell} \times t} \right), \forall 0 \leq t \leq t_c$$

- The analytical solution for the internal concentration of the parent compound during the depuration phase, previously referred as Equation (15):

$$C_p(t) = \left( C_0 - \frac{U}{E + M} \times \left( 1 - e^{(E+M) \times t_c} \right) \right) \times e^{-(E+M) \times t}, \forall t > t_c$$

- The analytical solution for the internal concentration of metabolite  $\ell$  during the depuration phase, previously referred as Equation (23):

$$C_{m_\ell}(t) = \frac{k_{m_\ell}}{k_{e_\ell} - (E + M)} \times \left( C_0 - \frac{U}{E + M} \right) \times \left( e^{-(E+M) \times t} - e^{-k_{e_\ell} \times t} \right) + \frac{k_{m_\ell}}{k_{e_\ell}} \times \frac{U}{E + M} \times \left( e^{-k_{e_\ell} \times (t-t_c)} - e^{-k_{e_\ell} \times t} \right) + \frac{k_{m_\ell}}{k_{e_\ell} - (E + M)} \times \frac{U}{E + M} \times \left( e^{-(E+M) \times (t-t_c)} - e^{-k_{e_\ell} \times (t-t_c)} \right), \forall t > t_c$$

We could fully finish the writing of the very final generic analytical solution of the one-compartment TK model with all the parameters to estimate from observed data using an inference process by replacing constants  $U$ ,  $E$  and  $M$  by  $U = \sum_{i=1}^I k_{u_i} \times c_i$ ,  $E = \sum_{j=1}^J k_{e_j}$  and  $M = \sum_{\ell=1}^L k_{m_\ell}$ , respectively.

#### 4. Model simulations

Model simulations of the generic set of solutions (Equations (3), (10), (15) and (23)) were performed under the R software with 500 time points in  $[0; t_f]$  where  $t_f$  stands for the final time of each simulation. These simulations illustrate the toxicokinetic in three case studies where different compounds are bioaccumulated by different species. In order to proceed, the time duration of the accumulation phase (parameter  $t_c$ ) is required, as well as the exposure concentrations in the media and the model parameter values (Table 2). Figures 1 to 5 show the simulations of internal concentrations over time for the three species-compound combinations considered in case studies described below. All necessary parameter values were directly picked-up from the MOSAIC<sub>bioacc</sub> (<https://mosaic.univ-lyon1.fr/bioacc>) exam-

130 ple files. For each case study, TK model parameters were varied one-at-a-  
131 time with 20, 50 and 80% of increase from the original value.

#### 132 4.1. The very simplest one-compartment TK model

133 Equations (3) and (15) are simulated for a simple case study where fish are  
134 exposed to a highly hydrophobic chemical contaminated water. Only natural  
135 excretion is considered [2] (Figure 1 and Table 2). The corresponding inputs  
136 are the exposure concentration  $c_w$  (referring to  $c_i$  and  $I = 1$ ), the uptake  
137 rate from water  $k_{uw}$  (referring to  $k_{ui}$  and  $I = 1$ ) and the excretion rate  
138  $k_{ee}$  (referring to  $k_{ej}$  and  $J = 1$ ). When parameter  $k_{uw}$  increases, internal  
139 concentrations are higher (*e.g.*, blue curve in Figure 1.a) than with the  
140 original value (orange curve in Figure 1.a). Biologically speaking, the higher  
141 the uptake rate is for a given substance, the more it is bioaccumulated by  
142 organisms. Conversely, an increase in parameter  $k_{ee}$  leads to a lower internal  
143 concentration (*e.g.*, blue curve in Figure 1.b), consistent with the known  
144 underlying biological mechanism: the faster a contaminant is eliminated,  
145 the quicker its concentration decreases in organisms.

#### 146 4.2. A one-compartment TK model with several exposure routes, no metabo- 147 lites

148 Equations (3) and (15) are simulated for a freshwater shrimp exposed to an  
149 organic chlorine compound by contaminated sediment and food. Only nat-  
150 ural excretion is considered as elimination process [7] (Figure 2 and Table  
151 2). The corresponding inputs are the exposure concentration via sediment  
152  $c_s$  and via food  $c_f$  (referring to  $c_i$  and  $I = 2$ ), the two uptake rates from  
153 sediment and food,  $k_{us}$  and  $k_{uf}$  respectively (referring to  $k_{ui}$  and  $I = 2$ )

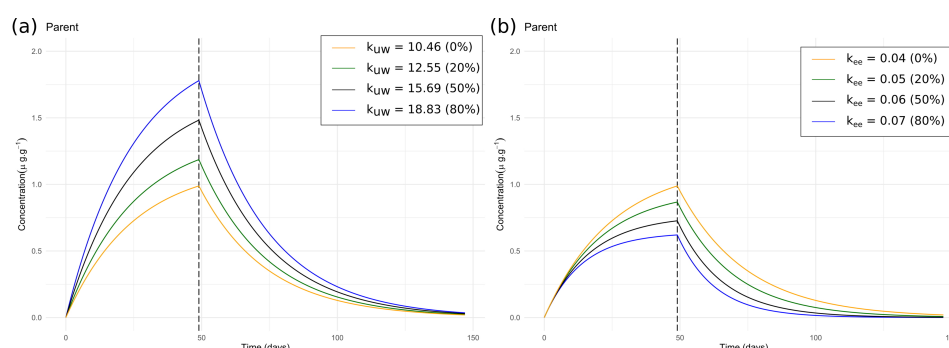

Figure 1: Example of model simulations for a simple TK model (exposure by water and elimination by excretion) and the influence of variations of parameters (a)  $k_{uw}$  (uptake rate) and (b)  $k_{ee}$  (excretion rate).

and the excretion rate  $k_{ee}$  (referring to  $k_{ej}$  and  $J = 1$ ). When parameter  $k_{us}$  increases, internal concentrations are higher (*e.g.*, blue curve in Figure 2.a) than with the original value (orange curve in Figure 2.a). Biologically speaking, the higher the uptake rate from sediment is for a given substance, the stronger it is bioaccumulated by organisms. Regarding the exposure from food, as parameter  $k_{uf}$  is low, its variation does not significantly influence the internal concentration of the contaminant (Figure 2.b). Biologically speaking, this means that the exposure via sediment is the major route of contamination for these organisms. Besides, as previously shown in section 4.1, an increase in parameter  $k_{ee}$  leads to a faster decreasing concentration (*e.g.*, blue curve in Figure 2.c).

### 4.3. A one-compartment TK model with one exposure route, several metabolites

Equations (3), (10), (15) and (23) are simulated for a freshwater shrimp exposed to an organic biocide by contaminated water. Three metabolites

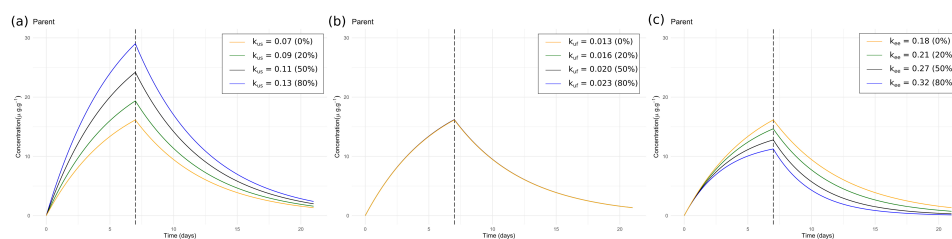

Figure 2: Example of model simulations for a TK model with multiple exposure routes (by sediment and food) and influence of variations of parameters (a)  $k_{u_s}$  (uptake rate from sediment), (b)  $k_{u_f}$  (uptake rate from food) and (c)  $k_{e_e}$  (excretion rate).

169 derived from the parent compound are considered [1] together with the nat-  
 170 ural excretion (Figures 3 to 5 and Table 2). The corresponding inputs are  
 171 the exposure concentration via water  $c_w$  (referring to  $c_i$  and  $I = 1$ ), the up-  
 172 take rate  $k_{u_w}$  (referring to  $k_{u_i}$  and  $I = 1$ ), the excretion rate  $k_{e_e}$  (referring to  
 173  $k_{e_j}$  and  $J = 1$ ), the three metabolization rates  $k_{m_1}$ ,  $k_{m_2}$  and  $k_{m_3}$  (referring  
 174 to  $k_{m_\ell}$  and  $L = 3$ ) and the three elimination rates of the metabolites  $k_{e_1}$ ,  
 175  $k_{e_2}$  and  $k_{e_3}$  (referring to  $k_{e_\ell}$  and  $L = 3$ ). When parameter  $k_{m_1}$  increases, in-  
 176 ternal concentrations are higher for metabolite 1 (*e.g.*, blue curve in Figure  
 177 3.b) than with the original value (orange curve in Figure 3.b). Conversely,  
 178 internal concentrations are lower for the parent compound (*e.g.*, blue curve  
 179 in Figure 3.a). Biologically speaking, the more the biotransformation rate  
 180 for a given metabolite is increasing, the higher is its concentration within or-  
 181 ganisms due to the highly biotransformation of the parent compound. This  
 182 leads to a lower internal concentration of the parent compound than with  
 183 the original value of  $k_{m_1}$  (*e.g.*, blue curve, Figure 3.a). An increase in  $k_{m_1}$   
 184 also induces a decrease in the internal concentrations of the other metabo-  
 185 lites (Figure 3.c and d). Besides, when parameter  $k_{e_1}$  increases, this only  
 186 affects the internal concentration of metabolite 1 (Figure 4.b). In addition,

as previously viewed (sections 4.1 and 4.2), an increase in parameter  $k_{uw}$  will induce high internal concentrations for both the parent compound and its metabolites (Figure 5). Indeed, the more the internal concentration of the parent compound is increasing, the more the biotransformation process will intensify, leading to high internal concentrations for each metabolite.

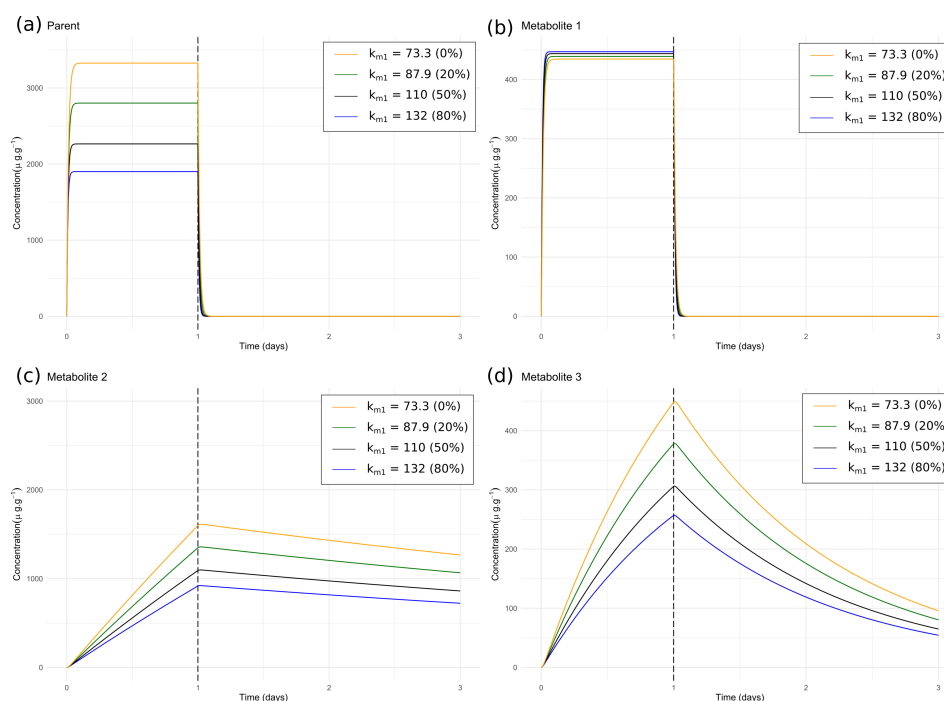

Figure 3: Example of model simulations for a TK model with biotransformation (three metabolites) and influence of the variations of parameter  $k_{m1}$  (biotransformation rate for metabolite 1) on (a) the parent compound, (b) metabolite 1, (c) metabolite 2, and (d) metabolite 3.

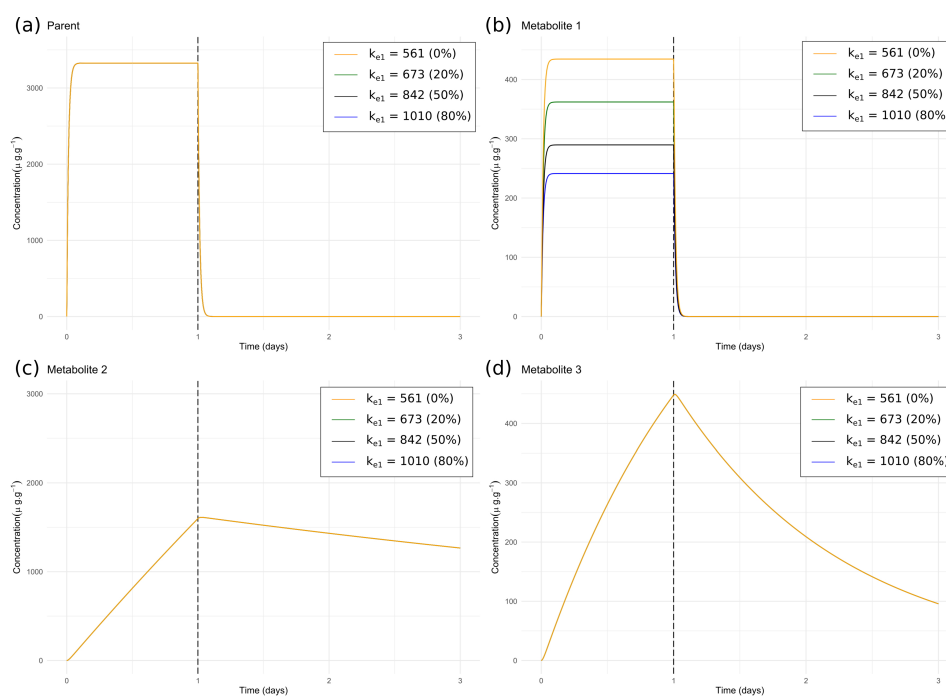

Figure 4: Example of model simulations for a TK model with biotransformation (three metabolites) and influence of the variations of parameter  $k_{e1}$  (elimination rate of metabolite 1) on (a) the parent compound, (b) metabolite 1, (c) metabolite 2, and (d) metabolite 3.



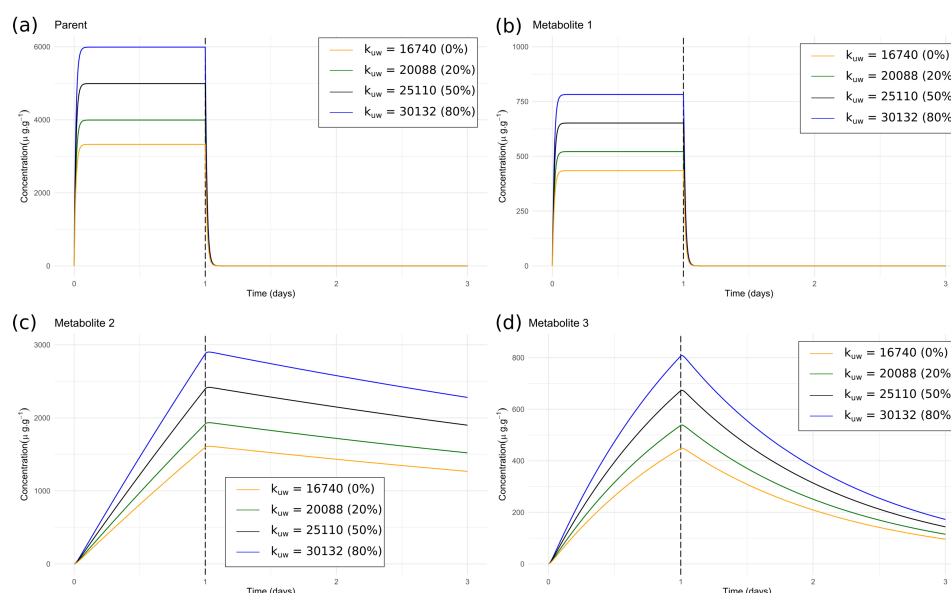

Figure 5: Example of model simulations for a TK model with biotransformation (three metabolites) and influence of the variations of parameter  $k_{uw}$  on (a) the parent compound, (b) metabolite 1, (c) metabolite 2, and (d) metabolite 3.

## 192 5. Acknowledgments

193 The authors would like to express their sincere thanks to Miléna Kaag, Yacout  
 194 Lahlou and Nino Molin who designed the MOSAIC<sub>bioacc</sub> prediction tool as part of  
 195 their 4<sup>th</sup> year study project at the National Institute of Applied Sciences (INSA)  
 196 in Lyon (France). This work was made under the umbrella of the French GDR  
 197 “Aquatic Ecotoxicology” framework aiming at fostering stimulating scientific dis-  
 198 cussions and collaborations for more integrative approaches. This work was fi-  
 199 nancially supported by the Graduate School H2O’Lyon (ANR-17-EURE-0018) and  
 200 “Université de Lyon” (UdL), as part of the program “Investissements d’Avenir”  
 201 run by “Agence Nationale de la Recherche” (ANR).

| Symbol                           | Meaning and unit                                                          |
|----------------------------------|---------------------------------------------------------------------------|
| $t$                              | time (in time units)                                                      |
| $t_c$                            | duration of the accumulation phase (in time units)                        |
| $C_p(t)$                         | internal concentration of the parent compound at $t$ (in $\mu g.g^{-1}$ ) |
| $C_{m_\ell}(t)$                  | internal concentration of metabolite $\ell$ at $t$ (in $\mu g.g^{-1}$ )   |
| $U = \sum_{i=1}^I k_{u_i} c_i$   | sum of all uptake terms                                                   |
| $c_i$                            | concentration via the exposure route $i$ (in $\mu g.mL^{-1}$ )            |
| $E = \sum_{j=1}^J k_{e_j}$       | sum of all elimination terms for the parent compound                      |
| $M = \sum_{\ell=1}^L k_{m_\ell}$ | sum of all elimination terms for metabolite $\ell$                        |
| $i$                              | index of exposure sources, $i = 1 \dots I$                                |
| $j$                              | index of elimination processes, $j = 1 \dots J$                           |
| $\ell$                           | index of metabolites, $\ell = 1 \dots L$                                  |
| $I$                              | total number of exposure sources (#)                                      |
| $J$                              | total number of elimination processes (#)                                 |
| $L$                              | total number of metabolites (#)                                           |
| $k_{u_i}$                        | uptake rate of exposure source $i$ (per time units)                       |
| $k_{e_j}$                        | excretion rates of elimination process $j$ (per time units)               |
| $k_{e_\ell}$                     | excretion rates of metabolite $\ell$ (per time units)                     |
| $k_{m_\ell}$                     | metabolization rate of metabolite $\ell$ (per time units)                 |
| $R = \frac{U}{E+M}$              | NA                                                                        |
| $D_\ell = k_{e_\ell} - (E + M)$  | NA $\forall \ell = 1 \dots L$                                             |
| $Q = C_0 - R(1 - e^{(E+M)t_c})$  | NA                                                                        |

Table 1: Symbols, meaning and units for all parameters and variables involved in the full set of ordinary differential equations defining the generic one-compartment toxicokinetic model. # stands for numbers, while NA means 'Not Applicable'.

Table 2: Combinations of inputs for model simulations according to Figure 1. Hyphens stands for no required inputs.

| Input    | Units                     | Simple<br>(section 4.1) | Multiple exposures<br>(section 4.2) | Biotransformation<br>(section 4.3) |
|----------|---------------------------|-------------------------|-------------------------------------|------------------------------------|
| $c_w$    | $\mu g.mL^{-1}$           | 0.0044                  | -                                   | 15.53                              |
| $c_s$    | $\mu g.g^{-1}$            | -                       | 56.6                                | -                                  |
| $c_f$    | $\mu g.g^{-1}$            | -                       | 1.46                                | -                                  |
| $t_c$    | <i>days</i>               | 49                      | 7                                   | 1                                  |
| $k_{uw}$ | <i>days</i> <sup>-1</sup> | 10.46                   | -                                   | 16740                              |
| $k_{us}$ | <i>days</i> <sup>-1</sup> | -                       | 0.071                               | -                                  |
| $k_{uf}$ | <i>days</i> <sup>-1</sup> | -                       | 0.013                               | -                                  |
| $k_{m1}$ | <i>days</i> <sup>-1</sup> | -                       | -                                   | 73.27                              |
| $k_{m2}$ | <i>days</i> <sup>-1</sup> | -                       | -                                   | 0.5166                             |
| $k_{m3}$ | <i>days</i> <sup>-1</sup> | -                       | -                                   | 0.1957                             |
| $k_{ee}$ | <i>days</i> <sup>-1</sup> | 0.04                    | 0.178                               | 4.164                              |
| $k_{e1}$ | <i>days</i> <sup>-1</sup> | -                       | -                                   | 561                                |
| $k_{e2}$ | <i>days</i> <sup>-1</sup> | -                       | -                                   | 0.123                              |
| $k_{e3}$ | <i>days</i> <sup>-1</sup> | -                       | -                                   | 0.7808                             |

## 202 References

- 203 [1] Ashauer, R., Hintermeister, A., O'Connor, I., Elumelu, M., Hollender, J., &  
204 Escher, B. I. (2012). Significance of xenobiotic metabolism for bioaccumulation  
205 kinetics of organic chemicals in gammarus pulex. *Environmental Science &*  
206 *Technology*, 46(6), 3498–3508. PMID: 22321051.
- 207 [2] Crookes, M. J., & Brooke, D. N. (2011). Estimation of fish bioconcentration  
208 factor ( BCF ) from depuration data. Tech. rep., Environment Agency, Horizon  
209 House, Bristol, UK.
- 210 [3] Grech, A., Brochot, C., Dorne, J.-L., Quignot, N., Bois, F. Y., & Beaudouin, R.  
211 (2017). Toxicokinetic models and related tools in environmental risk assessment  
212 of chemicals. *Science of the Total Environment*, 578, 1–15.
- 213 [4] Kuo, D. T. F., & Chen, C. C. (2016). Deriving in vivo biotransformation rate  
214 constants and metabolite parent concentration factor/stable metabolite factor  
215 from bioaccumulation and bioconcentration experiments: An illustration with  
216 worm accumulation data. *Environmental Toxicology and Chemistry*, 35(12),  
217 2903–2909.
- 218 [5] Mavroudis, P. D., Hermes, H. E., Teutonico, D., Preuss, T. G., & Schneck-  
219 ener, S. (2018). Development and validation of a physiology based model for  
220 the prediction of pharmacokinetics/toxicokinetics in rabbits. *Plos One*, 13(3),  
221 e0194294.
- 222 [6] Nyman, A. M., Schirmer, K., & Ashauer, R. (2014). Importance of toxicokinetic-  
223 ics for interspecies variation in sensitivity to chemicals. *Environmental Science*  
224 *and Technology*, 48, 5946–5954.
- 225 [7] Ratier, A., Lopes, C., Labadie, P., Budzinski, Hélène Delorme, N., Quéau, H.,  
226 Peluhet, L., Geffard, O., & Babut, M. (2019). A unified Bayesian framework

- 227 for estimating model parameters for the bioaccumulation of organic chemicals  
228 by benthic invertebrates: proof of concept with PCB153 and two freshwater  
229 species. *Ecotoxicology and Environmental Safety*, 180, 33–42.
- 230 [8] Sasso, A. F., Isukapalli, S. S., & Georgopoulos, P. G. (2010). A generalized  
231 physiologically-based toxicokinetic modeling system for chemical mixtures con-  
232 taining metals. *Theoretical Biology and Medical Modelling*, 7(1), 1–17.
- 233 [9] Valcke, M., Bourgault, M. H., Gagné, M., & Levallois, P. (2021). A probabilistic  
234 toxicokinetic modeling approach to the assessment of the impact of daily vari-  
235 ations of lead concentrations in tap water from schools and daycares on blood  
236 lead levels in children. *Science of the Total Environment*, 775, 145866.
